# Supplementary material
Source: PubMed Central journal article supplement (PMC9481986)
Supplement: mmc1.pdf [file mmc1.pdf]

## **Supplemental Information**

### **A truncated reverse transcriptase enhances prime editing by split AAV vectors**

**Zongliang Gao, Sujan Ravendran, Nanna S. Mikkelsen, Jakob Haldrup, Huiqiang Cai, Xiangning Ding, Søren R. Paludan, Martin K. Thomsen, Jacob Giehm Mikkelsen, and Rasmus O. Bak**

# SUPPLEMENTARY INFORMATION

## Supplemental Figures

### Figure S1

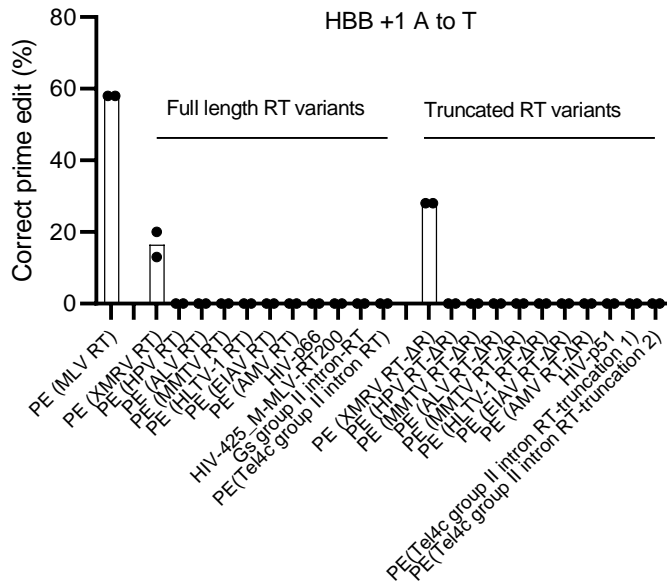

**Figure S1. Screening of RT variants for prime editing activity.** The RT variants were human codon-optimized by GenScript and used to replace the M-MLV RT to form PE variants. PE constructs were transfected together with plasmids encoding the pegRNA and ngRNA into HEK293T cells and prime editing results were analyzed after 3 days. The data are presented as mean values with all data points from independent experiments shown.

**Figure S2**

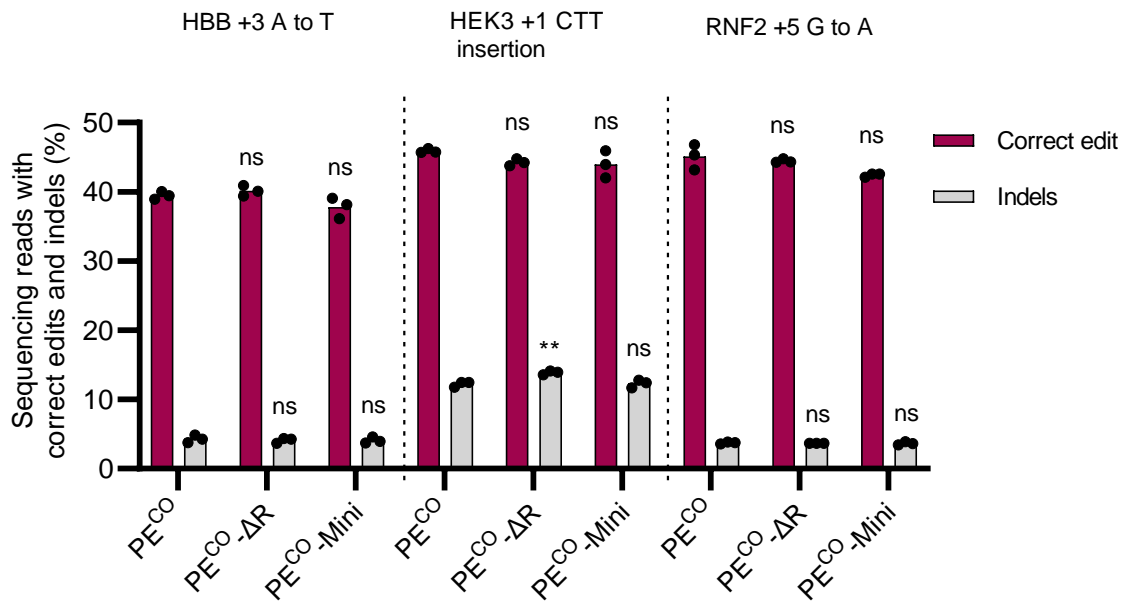

**Figure S2. PE<sup>CO</sup>, PE<sup>CO</sup>-ΔR, and PE<sup>CO</sup>-Mini have the same prime editing outcomes.** NGS was performed to quantify the frequency of correct prime edits and indels. The bars show mean values with all data points shown for biological replicates. ns, not significant; \*\*, p < 0.01.

**Figure S3**

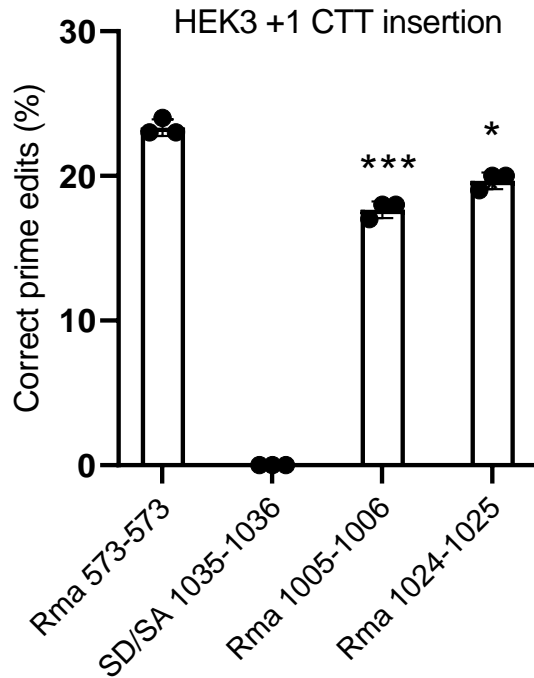

**Figure S3. Comparison of Rma 573-574 with other reported split sites.** The split constructs were made using the same plasmid backbone, and a same molar amount of these plasmids were transfected into HEK293T cells together with equal amounts of pegRNA and ngRNA plasmids. Prime editing efficiencies were determined by ICE analysis of Sanger sequencing chromatograms. The bars represent means with data points from the biological replicates shown. \*,  $p < 0.05$ ; \*\*\*,  $p < 0.001$ .

**Figure S4**

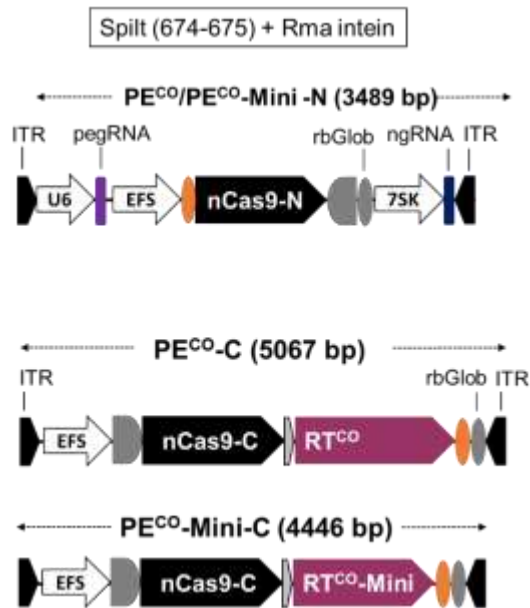

**Figure S4. Schematic of the AAV vectors carrying the split PE system.** The sizes of the AAV vector genomes including the ITRs are illustrated schematically. To prevent recombination, we used two different RNA Pol III promoters (U6 and 7SK) to drive pegRNA and ngRNA expression, respectively. Also, an optimized gRNA scaffold with some sequence modifications were used for the pegRNA.<sup>1</sup> EFS: EF-1 Alpha Short promoter.

**Figure S5**

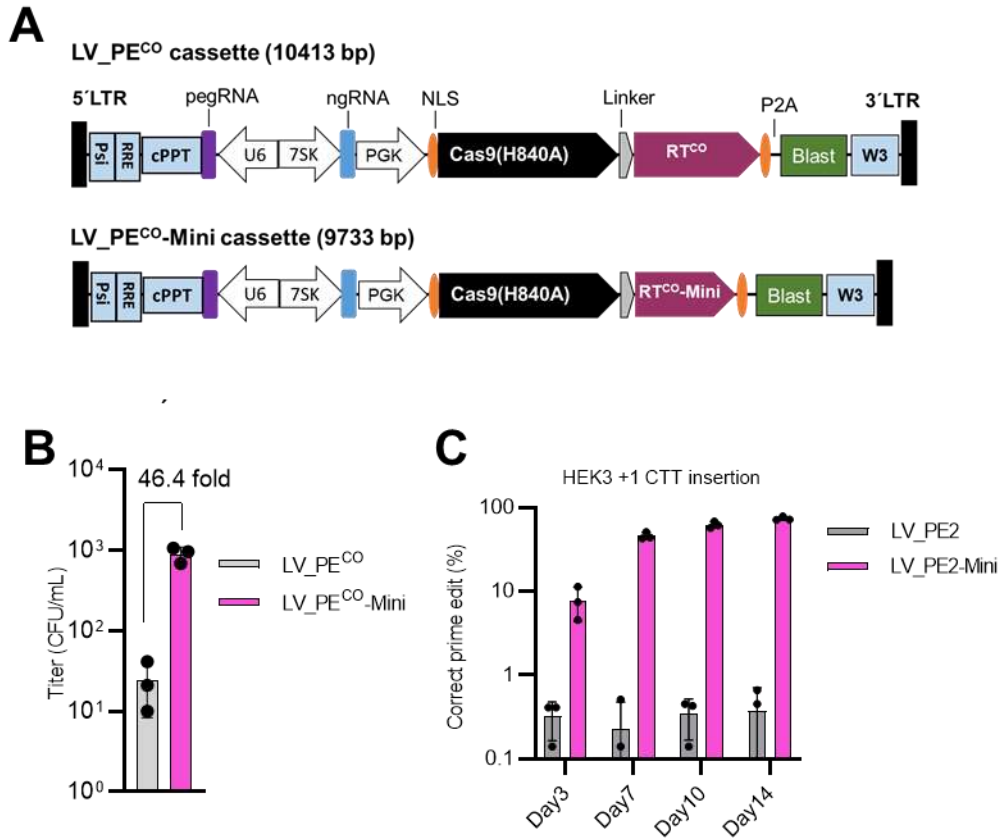

**Figure S5. PE<sup>CO</sup>-Mini provides an LV titer advantage over PE<sup>CO</sup>.** (A) Schematic of LV vectors encoding all-in-one PE<sup>CO</sup>-Mini or PE<sup>CO</sup> systems. Psi, packaging signal; RRE, Rev response elements; cPPT, central polypurine tract. (B) Titer measurement of LV<sub>PE<sup>CO</sup></sub> and LV<sub>PE<sup>CO</sup>-Mini</sub>. (C) Prime editing efficiencies of LV<sub>PE<sup>CO</sup></sub> and LV<sub>PE<sup>CO</sup>-Mini</sub> in HEK293T cells. See Materials and Methods section for experimental details. Bars represent means  $\pm$  SD with individual data points shown for the biological replicates.

**Figure S6**

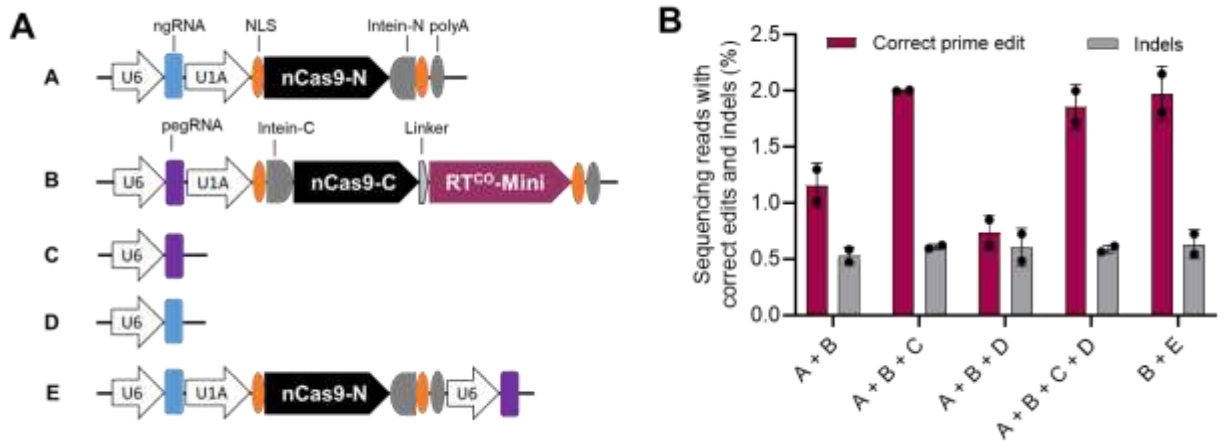

**Figure S6. pegRNA expression cassettes in both split AAV vectors enhances prime editing.**

(A) Schematic figure of plasmids harboring PE expression cassette(s). (B) Prime editing analysis of different plasmid combinations for +1A insertion in Hepa 1-6 cells. Cells were transfected with plasmids and after 3 days the cells were subjected to prime editing analysis by NGS. Bars represent means  $\pm$  SD with individual data point shown for the biological replicates.

1. Dang, Y., Jia, G., Choi, J., Ma, H., Anaya, E., Ye, C., Shankar, P., and Wu, H. (2015). Optimizing sgRNA structure to improve CRISPR-Cas9 knockout efficiency. *Genome biology* 16, 1-10.

## Supplemental Data 1: RT variants from different species

### HIV-p51 (1320 bp)

CCTATCAGCCCCATCGAGACAGTGCCTGAAAGCTGAAACCTGGAATGGATGGCCCTAAAGTGAAGCAATGGCCTCTGACCGAGGAAAAGATCAAG  
GCCCTGGTCGAGATTTGTACAGAGATGGAAAAGGAGGGCAAGATTAGCAAGATTGGACCTGAAAACCCCTTACAACACCCCTGTCTTTGCCATCAAGA  
AAAAAGACAGCACCAGTGGCGGAAGCTGGTGGACTTTAGAGAGCTGAACAAGCGGACCCAGGATTTCTGGGAGGTGCAGGCTCGGCATCCCCACC  
CCGCCGGCTGAAGAAAAAAGAGCGTGACCGTGTGGATGTGGGCGACGCCTACTTCTCCGTGCCCTGGACGAGGACTTCCGCAAGTACACCGC  
TTTACAATCCAAGCATCAACAACGAGACACCAGGAATCAGATACCAATACAATGTGCTGCCTCAGGGCTGGAAGGGTAGCCCTGCCATCTTCCAG  
AGCAGATGACCAAAATCTGGAGCCTTTAGAAAAGCAGAACCCTGATATCGTGATCTACCAGTATATGGACGACCTGTACGTGGGCGAGCAGCTGG  
AAATCGGCCAGCACAGAACAAGATCGAGGAAGTGGCAGCACCTCTGAGGTGGGACTGACTACCCCGATAAGAAGCACCAGAAAAGAACCTC  
CTTCTGTGGATGGCTACGAGTGCACCTGACAAATGGACAGTGCAGCCTATCGTGTGCCTGAGAAGGACAGCTGGACCGTGAATGACATCCA  
AAAGCTGGTTGGCAAGTGAAGTGGGCCAGCCAGATCTACCCTGGCATTAAAGGTGGCGCAGCTGTGCAAGCTGTAGAGGACCAAGGCGCTGAC  
CGAAGTATCCCTCTGACCGAAGAGGCCGAGCTGGAAGTGGCCGAGAACAGAAAATCTGAAGGAACCCGTGCACGGCGTGTACTACGACCCCTC  
TAAGGACCTGATCGCCGAGATCCAGAAGCAGGGCCAGGGCCAGTGGACCTACCAAATCTACCAGGAGCCTTTTAAAGAACCTGAAGACCGGCAAATA  
CGCCAGAACCAGAGGCGCCACACCAACGACGTGAAGCAGCTGACAGAAGCCGTGCAAGATCACACAGAGAGCATCGTGATCTGGGGCAAGAG  
CCCAAAGTTCAAGCTGCCAATCCAGAAGGAAACATGGGAAACATGGTGGACCGAGTACTGGCAGGCTACATGGATCCCTGAGTGGGAGTTCTGTAA  
TACCCCTCCACTGGTCAAACCTGTGGTACCAGCTGGAAGGAAACCTATCGTAGGCGCTGAGACCTC

### HIV-p66 (1680 bp)

CCTATCAGCCCCATCGAGACAGTGCCTGAAAGCTGAAACCTGGAATGGATGGCCCTAAAGTGAAGCAATGGCCTCTGACCGAGGAAAAGATCAAG  
GCCCTGGTCGAGATTTGTACAGAGATGGAAAAGGAGGGCAAGATTAGCAAGATTGGACCTGAAAACCCCTTACAACACCCCTGTCTTTGCCATCAAGA  
AAAAAGACAGCACCAGTGGCGGAAGCTGGTGGACTTTAGAGAGCTGAACAAGCGGACCCAGGATTTCTGGGAGGTGCAGCTCGGCATCCCCACC  
CCGCCGGCTGAAGAAAAAAGAGCGTGACCGTGTGGATGTGGGCGACGCCTACTTCTCCGTGCCCTGGACGAGGACTTCCGCAAGTACACCGC  
TTTACAATCCAAGCATCAACAACGAGACACCAGGAATCAGATACCAATACAATGTGCTGCCTCAGGGCTGGAAGGGTAGCCCTGCCATCTTCCAG  
AGCAGATGACCAAAATCTGGAGCCTTTAGAAAAGCAGAACCCTGATATCGTGATCTACCAGTATATGGACGACCTGTACGTGGGCGAGCAGCTGG  
AAATCGGCCAGCACAGAACAAGATCGAGGAAGTGGCAGCACCTCTGAGGTGGGACTGACTACCCCGATAAGAAGCACCAGAAAAGAACCTC  
CTTCTGTGGATGGCTACGAGTGCACCTGACAAATGGACAGTGCAGCCTATCGTGTGCCTGAGAAGGACAGCTGGACCGTGAATGACATCCA  
AAAGCTGGTTGGCAAGTGAAGTGGGCCAGCCAGATCTACCCTGGCATTAAAGGTGGCGCAGCTGTGCAAGCTGTGAGAGGACCAAGGCGCTGAC  
CGAAGTATCCCTCTGACCGAAGAGGCCGAGCTGGAAGTGGCCGAGAACAGAAAATCTGAAGGAACCCGTGCACGGCGTGTACTACGACCCCTC  
TAAGGACCTGATCGCCGAGATCCAGAAGCAGGGCCAGGGCCAGTGGACCTACCAAATCTACCAGGAGCCTTTTAAAGAACCTGAAGACCGGCAAATA  
CGCCAGAACCAGAGGCGCCACACCAACGACGTGAAGCAGCTGACAGAAGCCGTGCAAGATCACACAGAGAGCATCGTGATCTGGGGCAAGAG  
CCCAAAGTTCAAGCTGCCAATCCAGAAGGAAACATGGGAAACATGGTGGACCGAGTACTGGCAGGCTACATGGATCCCTGAGTGGGAGTTCTGTAA  
TACCCCTCCACTGGTCAAACCTGTGGTACCAGCTGGAAGGAAACCTATCGTAGGCGCTGAGACCTTCTACGTGGACGGCGCCGCTTCTAGAGAGACA  
AAACTTGGAAAGGCGGATAATGTGACCAATAGAGGCGACAGAAAAGTGTGACCCCTGACAGATACCACCAACCAGAAAACCGAGCTGCAGGCCATC  
CACCTGGCCCTCAAGACTCTGGCCTCGAGGTGAACATCGTGACAGACTCTCAGTATGCCCTGGGCATCATCCAGGCCAGCCTGATAAGTCCGAGA  
GGAGCTGGTGAACAGATCATCGAACAGCTGATCAAGAAGGAAAAGGTCTACCTGGCTTGGTCCCCGCTCATAAGGGAATTGGCGGCAACGAGC  
AGGTGGATAAGCTGGTGTCCCGGCATCCGGAAGTGTG

### HIV-425 \_MLV-RT-200 (1275bp)

CCTATCAGCCCCATCGAGACAGTGCCTGAAAGCTGAAACCTGGAATGGATGGCCCTAAAGTGAAGCAATGGCCTCTGACCGAGGAAAAGATCAAG  
GCCCTGGTCGAGATTTGTACAGAGATGGAAAAGGAGGGCAAGATTAGCAAGATTGGACCTGAAAACCCCTTACAACACCCCTGTCTTTGCCATCAAGA  
AAAAAGACAGCACCAGTGGCGGAAGCTGGTGGACTTTAGAGAGCTGAACAAGCGGACCCAGGATTTCTGGGAGGTGCAGCTCGGCATCCCCACC  
CCGCCGGCTGAAGAAAAAAGAGCGTGACCGTGTGGATGTGGGCGACGCCTACTTCTCCGTGCCCTGGACGAGGACTTCCGCAAGTACACCGC  
TTTACAATCCAAGCATCAACAACGAGACACCAGGAATCAGATACCAATACAATGTGCTGCCTCAGGGCTGGAAGGGTAGCCCTGCCATCTTCCAG  
AGCAGATGACCAAAATCTGGAGCCTTTAGAAAAGCAGAACCCTGATATCGTGATCTACCAGTATATGGACGACCTGTACGTGGGCGAGCAGCTGG  
AAATCGGCCAGCACAGAACAAGATCGAGGAAGTGGCAGCACCTCTGAGGTGGGACTGACTACCCCGATAAGAAGCACCAGAAAAGAACCTC  
CTTCTGTGGATGGCTACGAGTGCACCTGACAAATGGACAGTGCAGCCTATCGTGTGCCTGAGAAGGACAGCTGGACCGTGAATGACATCCA  
AAAGCTGGTTGGCAAGCTGAGCTGGGCCAGCCAGATCTACCCTGGCATTAAAGGTGGCGCAGCTGTGCAAGCTGTGAGAGGACCAAGGCGCTGAC  
CGAAGTATCCCTCTGACCGAAGAGGCCGAGCTGGAAGTGGCCGAGAACAGAAAATCTGAAGGAACCCGTGCACGGCGTGTACTACGACCCCTC  
TAAGGACCTGATCGCCGAGATCCAGAAGCAGGGCCAGGGCCAGTGGACCTACCAAATCTACCAGGAGCCTTTTAAAGAACCTGAAGACCGGCAAATA  
CGCCAGAACCAGAGGCGCCACACCAACGACGTGAAGCAGCTGACAGAAGCCGTGCAAGATCACACAGAGAGCATCGTGATCTGGGGCAAGAG  
CCCAAAGTTCAAGCTGCCAATCCAGAAGGAAACATGGGAAACATGGTGGACCGAGTACTGGCAGGCTACATGGATCCCTGAGTGGGAGTTCTGTAA  
TACCCCTCCACTGGTCAAACCTG

### HPV RT (1827 bp); HPV RT-ΔR (1362 bp)

AATCAAGTCGGCCACCGAAGATCAGACCCACAATATCGCCACCGGCGACTACCCTCCAAGACCTCAGAAGCAGTACCCATCAATCCAAGGCCA  
AGCCTAGCATCCAGATCGTGATCGACGACCTGCTGAAGCAGGGCGTGTGACCCCTCAGAAGCAGCACCATGAACACCCCTGTGTACCCCGTGCCTAA  
GCCTGATGGAAGATGGCCGATGGTGTGGACTACCGGGAAGTGAACAAGACAATCCCTCTGACCGCCGACAGAACCAGCCTGTGTAAGATCCTG  
GCCACAATCGTGGCGGAGAAGTACAAGACCACACTGGACCTGGCCAACCGCTTCTGGGCCATCCTATCACACCTGAGAGCTACTGGTGTACCGCAT  
TCACATGGCAGGGCAAGCAGTACTGTTGGACAGACTGCCTCAGGGCTTCTGAAACAGCCCTGCTGTGTTACCGCCGACGTGGTGGATCTGTGAAA  
GAGATCCCAACGCTCCAGGTGTACGTGGACGACATCTACCTGAGCCAGCAGCACCACCAAGCAACAGTGCAGCAGCTGGAAGGAGTGTTCAGATCC  
TGCTGACGGCCGGCTACGTGGTGTCCCTGAAGAGTCTGAGATCGGCCAGAAAACCGTGGAAATCCTGGGCTTCAACATCACCAAAAGAGGCAAGG  
CCTGACCGACACCTTCAAGACCAAGCTGTGTAACATACCCCTCCAAGGACCTGAAGCAGCTGCAGTCTATCTGGGCGTGTGAACTTGGCCGG  
AACTTCAATCCCAACTTCGCCGAACTGGTGCAGCCCTGTACAACCTGATTGCTCTGCAAGGGCAAGTACATCGAGTGGAGCGAGGAAAACACAA  
AGCAGCTCAACATGGTCAATCGAGGCCCTGAACACCGCCAGCAACCTGGAAGAGAGACTGCCGAGCAGCGGCTGGTCAATCAAGTGAACACAAGCC  
CTAGCGCCGGTATGTGGCTACTAACGAGACAGGCAAGAAACCCATCATGTACCTGAACTACGTGTTCTCAAGGCCGAGCTGAAAGTCTCCAT  
GCTGGAAAACCTGCTGACCACTGACAAAGGCCGTGATCAAGGCCATGGATCTGGCCATGGGCAAGAGATCCTGGTGTACAGCCCATCGTGTCC  
ATGACCAAGATCCAGAAAACCTCCCTGCCTGAGCGGAAGGCCCTGCCTATCAGATGGATACCTGGATGACCTATCTGGAAGATCCCGGATCCAGT  
TCCACTACGCAAGACCTGCCAGAGCTGAAGCCATCCCGCAGGTACACAAAGCTCTCAGAGCCCGTGAAGCACCCTCTCAGTATGAGGGCGT  
GTTCTACACAGACGGCAGCGCCATCAAGAGCCCGATCTACCAAGAGCAACAACCGCCGATGGAAATCGTGCACGCCACCTACAAGCTGAGTAC  
CAGGTGCTGAACAGTGGTCTATCCCTCTGGGCAACACACAGCCAGATGGCCGAAATTGCCGCTGTGGAATTCGCTGCAAGAAAGCCCTGAAGA  
TCCTGGACCTGTGCTGTGATCACCGACAGCTTTTACGTGGCCGAGAGGCCAAACAAGAGCTGCCCTACTGGAAGTCCAATGGCTTGTGAAACA



CAAGAAGAAGCCCTCAAGCACATCAGCAAGTGGAAAGTCTATCGCCGAGTGCCTGAGCATGAAGCCCAGATCACAATCCAGCAGCAGAGAAGGCCAT  
 CAGCCTGCAGATCCCCGTTCATCTGAAGGGAACGCCCTGGCCGACAAGCTGGCTACACAGGGCAGCTACGCTCGTGAAC

**MMTV (Mouse mammary tumor virus) RT (1725 bp); MMTV RT-ΔR (1338 bp)**

ATGATCGCGCCATCGAGAGCAACTGTTCGCCGATCAGATCAGCTGGAAGTCCGACCAGCCTGTGTGGTGAATCAGTGGCCCCTGAAGCAAGAGA  
 AGCTGCAGGCCCTGCAACAGCTGGTTCACAGAACAGCTGCAACTGGGCCACTGGAAAGAGAGCAACAGCCCCTGGAATACCCTGTGTTCTGTGATCAA  
 GAAAAAGTCCGGCAAGTGGCGGCTGTGCAGGATCTGAGAGCCGTGAATGCCACATGCACGACATGGGAGCAGTGCAGCCTGGACTGCCTTCTCCT  
 GTGGTGTGCCTAAAGGTGGGAGATCATCATCAGCTGCAGGACTGTTCTTCAACATCAAGCTGCACCCCGAGGACTGCAAGAGATTCGCCTT  
 CAGCGTGGCCCTCCTAAACTTCAAGCGGCCCTACCAGCCGTCCAGTGGAAAAGTTCTGCCCCAGGGCAGTGAAGAACAGCCCACTGTGCCAGAAA  
 TTCGTGGACAAGGCCATCTGACCCTGCGGGACAAGTACCAGGACAGTACATCTGTGACTACATGGACGACATCCTGCTGGCTACCCCAAGCAGAT  
 CCATCGTGGATGAGATCTGACCAGCAGTATTCAGGCTTGAACAAGCAGCGCCCTGGTGGTGTCCACCCGAGAAGATCCAGAAGTACGACAACCTGAA  
 GTACCTGGGACCCACATTCAGGGCCGACGCGGTGTTTACCAGAACTGCAGATCCCGGACCACAGCTGCGGACCCCTGAACGACTTTCAGAAGCTG  
 CTGGGCAACATCAACTGGATCAGACCCTTCCGAAGCTGACCACCGCGAGCTGAAGCCCTGTTCTGAGATCTTGAACGGCGACAGCAACCCCATCA  
 GCATCAGAAAGTGCACCTGAGGCCTGCAAGGCCCTGACGCTGTGAAAGGAGACTGTCTATCGCCAGAGTGAAGCGGCTGGACCTAGCAGAC  
 CTGAGGACCTGAGCTGAAACCGAGTACACCCCTACCCTGCCGTGGCCAAAAGTGGCGTGTGGAATGGATTCATCTGCCCCACATCAGCCCC  
 AAAGTGATTACCCTTACGACATCTTCTGCACCCAGCTCATCATCAAGGGCAGACACAGAAGCAAAGAGCTGTTACGCAAGGACCCCGATTACATCG  
 TGTGTCCTACACCAAGTGCAGTTCGACTGCTGTTCAAGGAAAAGAGGACTGGCCCTATAGCCTGCTGGGCTTCTGGCGAAGTGCATTTCCAT  
 CTGCCATAAGCCCTCTGCTGACATTACACTGCAGACCCCATCTTCCACACATGACCCAGCACCACCTCTGGAAAAGAGTGTGTATCTT  
 CACCGACGGCAGCCCAATGGCAGAAAGGCTGACCTATATCCAGGGCAGAGGCCATCATCAAAGAGAACACCCAGAACACCCGCTCAGCAGGCCGA  
 AATCGTGGCCGTGATCACCCTTTAGGAAGTGTCCAGACTGTCAACCTGTACAGCCAGCAAATACGTGACCCGACTGTCCCGAGATCGAG  
 ACAGCCACTGAGCCCCAGATCTACACCGAGCTGCTCATGACCGGCTGATCCCAAAGAGACAAGAGATTCTACATCGGCCAC  
 ATCCGGGCCATACAGGACTGCCTGGACCAGTGGTCAGGCAATGCCTATGCGCATAGCCTGACCAGAATCTCT

**ALV(Avian leukosis virus) RT; ALV RT-ΔR (1335 bp)**

ACAGTGGCTCTGCACCTGGCCATTCTCTGAAGTGGAAAGCCCGATCACACCCTGTGTGGATCGATCAGTGGCCCTGCTGCCTGAGGGAAAGTGGTGGC  
 TCTGACACAGCTGGTGGAAAAAGAACTGCAGCTGGGCCACATAGGCCAGCCTGTCTTGTGGAAACACCCGAGTTCGTGATCCGGAAGGCCAGC  
 GGCAGCTATAGACTGTGATACCTGAGAGCCGTGAACGCCAACTGAGCCTTTTGGAGCTGTTCAGCAGGGCCGCTTCTAGCAGTGGCTGCTGCTG  
 TAGAGGATGGCCCTGATGGTGTGAGCCTGAGGACTGCTTCTTACGATCCCTCTGGCCGAGCAGGACAGAGAGGCCCTTCGCTTTTACACTGCCCA  
 GCCTGAACAATCAGGCCCTGCCAGACGGTTCAGTGGAAAGTTCGCCCCAGGGCAGTACATGCAGCCCAATCTGTCTGCTGGTGTGCTGGGACA  
 GGTGCTGGAACCCCTGAGACTGAAGCACCAGCCTGAGAAATGGTGCACATGATGACGATCTGCTGCTGGCCGCTTCTTACAGATGGACTTGA  
 GCCGCTGGCGAGGAAGTGTAGCACCCTGGAAAGAGCCGGCTTACAATCAGCCCCGACAAGATCCAGAGAGAGCCCGGCTTCACTGCTGGGC  
 TATAAGCTGGGAGCCTATGTGGCCCTGTGGACTGGTGGCCGAGCCTAGAATTGCCCACTGTGGGACGCTGCAGAAACTCTGGGAAGCTGTC  
 AGTGGCTCAGCCCGCTTGGAACTCCCTCTAGACTGATGGGCCCTTACAGAGCCTGAGAGGCCGATCCCAACGAGGCCAGGAATGGAA  
 CCTGGACATGAAGATGGCTGGCGGAGATCGTGCAGCTGTCTACAACAGCCCTCTGGAAGATGGGACCCCGCTTGTGCTTGGAAAGCCGCTGTG  
 GCTAGATGTGAACAGGCCGCTATGGAGTGTGCTCGACAGGCCCTTCTTACACACCTAGACCTTGCCTGTGGCTGTCTTCCACACAGCCCAAGGCT  
 CTTACCCGCTGGCTGGAAAGTGTACCCTGTGATTACCAAGCTGAGGGCCCTCTGCTGTGGCAGCCCTTGGCAAGAGAGGCTGGACATCTGCTG  
 CTGCTGCTTACAGAGAGGATCTGCCACTGCCTGAAGGCATCTGTGGCCCTGAGAGGATTCGCGGAAAGATCAGAAAGCAGCCGACACCCCTAGCAT  
 TTCTGATATCGCCAGACCTCTGACCTGTCCCTGAAAAGTGGGGTGACAGATACCTCTGTCCTGGACCTACCCTTACAGATGCAAGCTGCTGTA  
 CCCACAAGGCGTGGTGTGTGGAGAGAAGGCCAGTGGGACTGAACAGAGATCGCCGATCTGGCGCCCTCTGTGCAGCACTGGAAAGCTAGAG  
 CAGTGGCCATGGCTGCTGCTGTGCTGCTTACCACACCTACCAACGTTGGTACCAGATTCTGCCTTGTGGCCAAGATGTGTGAAGATGGGCCAAGAG  
 GCGTGCCTATCAGCCCGCCCTTTTATTCTGGAAGATGCCCTGAGCCAGAGAAGGCCATGGTGTCTGTCTGCATGTGCGGCTCCATTCTGAGGT  
 GCCCGCTTTTACCGAGGGCAATGATGTGGCCGATAGCCAGGCCACCTTACAGCCCTAT

**XMRV(Xenotropic MuLV-related virus) RT; XMRV RT-ΔR (1542 bp)**

ACCTGAACATCGAGGACGAGTACCAGGCTGCAGAGACAAGCAAGAACCCGATGTGCCTCTGGGCGAGCACTGGCTGTCTGATTTTCCACAGGCCCT  
 GCGCGAGACAGCGGGAATGGGACTGTCTGTTAGACAGGCCCTCTGATCATCCCTCTGAAGGCCACACAGACCCCTGTGCTCCATCAGCAGTACCC  
 CATGAGCCAAGAGGCCCGGCTGGGAATCAAGCCCCACATTCAGAGACTGTGGACCAGGGCATCTGGTGCCTGTGTCAGAGCCCTTGAATACCCCT  
 CTGTGCGGCTGAAGAAGCCCGCACCAACGATTACAGACCCGTGAGCCGACTGCGGGAAGTGAACAAGAGAGTGGAAAGATATCCCAACCCGCTG  
 CCGAATCTTACAACCTGCTGCTGCTGCTTCCAGTGCCTTCCAGTGCCTGACACAGCTGCTGTGACACAGCTTCTTCTGCTGTCCGGCTGCACCT  
 ACAAGCCAGCCTCTGTTTGCCTTCGAGTGGCGGGATCTGAGATGGCATTAGCGGACAGTGCACCTGGACAGACTGCCCCAGGGCTTCAAGAACA  
 GCCCACACTGTTTACAGAGGCGCTGACAGAGATCTGGCCGACTCAGAATTTCAGCACCCGACCTGATCTGCTGTCAGTACGTTGACGATCTGCTG  
 CTGGCCGCAACAAGCGAGCAGGATTTGTACAGAGAGGAACACGGGCTGCTGTCAGACCCCTGGCAATCTGGGATATAGAGCCAGCCCAAGAAGGCC  
 CAGATCTGCCAGAAAAGTGAAGTACCTGGGCTACCTGCTGAAAGAGGGCCAGCGTTGGCTGACCGAGGCCAGAAAAGAACCCGTGATGGGCCAG  
 CCTACACCTAAGACACCCAGCAGTGTGAGAGATTCTGGGCAACCGCCGATCTGCAGACTGTGGATTCTGGCTTCCGCCGAGATGGCCGCTCTCT  
 GTATCCTTGAACCAAGACCCGCACACTGTTCAACTGGGCGCTGATCAGCAGAAAGCCCTACCAAGAGATCAAGCAGCCCTGCTGACAGCCCTGCT  
 CTGGGACTTCTGACCTGACCAAGCCTTTCGAGCTGTCTGTGGACGAGAAGCAGGGCTATGCCAAAGCGCTGCTGACACAGAAGCTCGGCCCTTGA  
 GAAAGCCAGTGGCTACCTGAGCAAGAACTGGATCCTGTGGCCGCTGGCTGGCCCTTGTGTGAGAATTGGTGGCCGCTATTGCCGTGTGACCAA  
 GGATGCGCGCAAGCTGACAAATGGGACAGCCCTCTGTTAATTCGTCCTCATGCCCTGGAAGCCCTGCTGAACAGCCCTCTGATCGGTGGCTGAGC  
 AACGCCAAGATGACACTACAGGCCATGCTGCTGGACACCGACAGAGTGCAGTTGGCCCTGTGGTGGCCCTGAATCTGTACTATTTGCTGCCCT  
 GCCTGAGAAAGAGGCCCTCAGATGCTTGGAAATCTGGCCGAAACACCGCCAGCAGGACAGGACCTGACCTGACCTGACTGATGCTGACCGCCGAC  
 TACACTGGTATACCGACGCGCAGCTTCCTGCAAGAAGGACAGCTAGACTGCGCAGGCTGTGACCAAGAGACAGAAAGTATTTGGCTAGA  
 GCCCTGCTGCCGGAACATCTGCTCAGAGAGCCAGCTGATTGCCCTGACACAGGCCCTGAAATGGCCGAGGCAAAAAGCTGAACTGTACACC  
 ACTCCAGATACGCTTTCAGCTGACTGCTGACGCGGAGATCTATGCGAAGAGGCCCTGTGACAGCCGAGGCGAGAGATTAAGAAACAAGA  
 ACGAGACTGTGCACTGTGAAGGCCCTGTTCCTGCTGAAGGCCCTGACGACTATCCACTGTCCAGCAGGCAAGGCAATCCGCTGAGGCCAG  
 AGGCAACAGAATGGCCGATCAGGCCGCTAGAGAAGCCCATGAAGGCCGTGGTGAACCTTCTACTGCTGCT

**HLTV-1(Human T-cell leukemia virus1) RT; HLTV-1 RT-ΔR (1317 bp)**

GGCTGGAACATCTGCTAGACACCTGAGACTCAGCAGTTCCTCTGAACCCCGAGAGACTGCAGGCTCTGCAGCATCTGTTTCGGAAGCCCTGG  
 AAGCCGGACACATCGAGCCTTACAGGCCCTGGCAACAACCCTGTGTTCCCGTGAAGAAGGCCAACGGCAGCCTGGCGGTTTATCCACGATCTGAG  
 AGCCACAACAGCTGACCGTGGATCTGAGCAGTAGCAGCCCTGGACCTCCTGACCTCAGCAGCCTGCTACAACACTGGCCCCTATGCGAGCCATC  
 GACTGAAGGACGCTTCTTCAGATCCCTCTGCCTAAGCAGTTCCAGCCTTACTTCGCTTACCTGTGCTCAGCAGTGCATAATCGCCGACGAC  
 AAGATACGGCCTGAAGGTTCTGCCCCAGGCTTCAAGAACAGCCCACTGTTCCGAGATGCAGATGCTGGCCTTACTCTGAGCCTATCCCGAGCCCT  
 TTCTCAGTGTGTGATCTGACATGAGACGACATCTGCTGCTGAGCCATCTCTGAGGATCTGCAGCAGCTGAGCGAAGCCACAATGGCCAGC

CTGATCTCTACGGCCTGCCTGTGTCTCAGGACAAGACCCAGCAGACCCCTGGCACCATCAAGTTTCTGGGCCAGATCATCAGCCCAACCACATCAC  
CTACGACGCGGTGCCTACCGTGCCTAATCAGATCCAGATGGGCTCTGCCTGAACTGCAGGCGCCTCTGGGAGAGATTAGTGGGTGTCCAAAGGGCACC  
CCTACACGTAGACAGCCTCTGCACAGCCTGTACTGTGCATGTGTGACCTGTGACAGGACATCCCTCGGGAGCAGATCTACCTGAACTACGCCAGGTGCAGTC  
CCTGATGCAACTGCAGCAGGCGCTGAGCCAGAAGTGCAGATCTAGACTGGCTCAGACCTGCCTCTGCTGGGAGCCATTATGCTGACCCTGACCGGC  
ACCACCACCGTGGTGTTCAGTCTAAGCAGCAGTGGCCCTCGTGTGGCTTCATGCTCTCTGCCTCACACCAGCCAGTGTCTTGGGGACAACCTGCT  
GGCTTCTGTCTGTGCTGCTGCTGACCAAGTGCACCTGTGACAGATATGGCCTGCTGTGCCAGACCATCCACCACAACATCAGCATCCAGACCTTCAACC  
AGTTTATCCAGACCAGGATCACCCAGCGTGCCTTCTGCTGCACACAGCCACCGGTTCAAGAACCTGGGAGCACAGACAGGCGAGCTGTGGAA  
CACCTTCTGAAAACCCTGCTCCCTGGCTCTGTGAAAGGCTTGACCCTGTGTTTACACTGAGCCCCATCATCATCAACACAGCCCCTTGCCTGTT  
CAGCGACCGCTTACATCTCAGGCCCTACATCCTGTGGGACAAGCACATCTGTCTCAGCGGAGCTTCCCAGTCTCCACACAACATCTGCC  
AGCAGGCAAGCTGCTGGGACTGCTTCCATGGACTGAGCAGCGCCAGATCTGGCACTGCTGAATATCTTTCTGGACAGCAAGTACCTGTACCATA  
CCTGGGACTCTGGCCCTGGGCACATTTACGGGCAAAGCTCTCAGGCCCTTTCAGGCAGTGTGCCAAGACTGCTGGCCCAAAAGTGATCTATA  
TGCACCACGTGGGAGCCACCAACCTGCCTGATCATGCAAGCTGAAGCCCTGACAGACGCCCTGCTGATCACCCCTATTCTGCAGCT

### EIAV(Equine infectious anemia virus) RT; EIAV RT-ΔR (1260 bp)

ATCGAGCTGAAAAGAGGGGACAATGGGCCCTAAGATCCCTCAGTGGCCCTGCACCAAGAGAAAGCTGGAAAGGGCCAAAGAAAACCGTGCAGAGACTG  
CTGAGCGAGGGCAAGACTCAGCGAGGCCAGGACAACAACCCCTACAACAGCCCATCTTCGTGATCAAAAAGCGGAGCGGCAAGTGGCGGCTGCTG  
CAGGATCTGAGAGAACTGAACAAGACCGTGAAGTGGGCACCGAGATCTCCAGAGGACTTCTCATCCTGGCGCCTGATCAAGTGAAGCACATGA  
CCGTGTGGACATCGGGACCGCTACTTCAACATCCCTCTGGACCTGAGTTCAGACCTACACCGCCTTCACTATCCCAGCATCAACCCCAAGAG  
CCTGACAAAGGATACTGTGGAAAGTGCCTGCTGAGGCTTCTGCTGAGCCCTACATCTACCAGAAAACCTGCAAGATTTCTGACGCCCTCCG  
CGAGAGATACCCTGAGGTGCAGCTGTACCAGTACATGGACGACCTGTTCTGTGGGCAGCAACCGGCAGCAAGAAGCAGCACAAAGAGCTGATCATCGA  
GCTGGCGGCCATCTGCAGAAGGGCTTGCAGACACCCGACGACAAGCTGCAAGAGGTGCCACCTTATAGCTGGCTGGGCTACCAGCTGTGCCCGGAG  
AATTGGAAGGTGCAGAAAATGCAGCTGGACATGGTCAAGAACCCACACTGAACGACGTGCAGAAAATGATGGGCAACATACCTGGATGAGCAGC  
GGAGTGCCTGGCCTGACCGTGAACATATCGCCGCCACCACAAGGGCTGCCTGGAATGAACCAGAAAAGTGTGACCGGAGGAAGCCAGAAA  
GAGCTGGAAGGACAACAGGAGAAGTACAAGAAGCGCCAGGGCCTGCAGTACTACAACCCGAGGAAGAGATGCTCTGCGAGGTGGAAATCACCAA  
GAACTACGAGGCCACTACGTGATCAAGCAGAGCCAGGGAATTTGTGGCGGCAGAAAATCATGAAGGCCAACAAGGCTGGTCCACCGTGA  
GAACCTGATGCTGCTGCAACACGTTGCCACCGAGAGCATACAAGAGTGGGCAAGTGGCCACCTTCAAGGTGCCCTTACCAAAGAACAAAGTG  
ATGTGGGAGATGCAGAAAGGATGGTACTACAGCTGGCTGCCCGAGATCGTGTACACCCACAGAGTGGTGCACGACGAGTGGCGGATGAAGCTGGT  
GAAGAACACTACGAGCGGATCACCATCTACACCGATGGCGGAAGCAGAACCGGAGGGAATTCGCGCTACGTTGACCTTCAACGGCAGGACCAAG  
CAGAAAAGACTGGGCCCCGTCACACATCAGGTGGCCGAAAGAATGGCCATCCAGTGGCCCTGGAAGATACCCCGGACAAAGCAAGTGAACATCGTG  
ACCGACAGCTACTGCTGGAAGAACATCACCGAAGGCTGGGCTCGAGGGACCTCAAAAATCTTGGTGGCCCATCATCCAGAAGATCCCGGAGAG  
AAGAAATCGTACTTGCCTGGTGCCTGGCCACAAGGGCTACTATGGAAATCAGTGGCCGACGAGGCCCAAGATCAAAGAGGAAATATGTCT  
GGCTACCGAGGGGACGAAATCAAAGAAAAGCGGACGAGGAGCTGCGCTTCAGCTTGTGTGCCCTACGATATCATGATCCCCGTGTCCGACACC  
AAGATCATCCCCACCGAGCTGAAGATCCAGTTCCACCTAACAGCTTCGGCTGGGTACAGGCAAGAGCAGCATGGCCAAACAGGGACTGCTGATCA  
ACGGCGGCATCATCGACAGGGCTACACCGCGAGATCCAAGTCACTGCACCAACATCGGCAAGTCCAACATCAAGCTGATCGAGGGCCAGAAGT  
TCGCCAGCTCATATCTCCAGCACACGAACAGCAGACAGCCCTGGGACGAGAGAAAGATCTCCAGAGAGGGCACAAGGCTTCCGAGCA  
CTGGCGTGTCTGGGTGAGAAATATCCAAGAGGCTCAGGACGAGCAGGAACTGGCACACAAGCCCAAGATCTGGCCAGAACTACAAGATCC  
CACTGACCGTGGCCAAGCAGATCACCAAGAA

### AMV(Avian myeloblastosis virus) RT; AMV RT-ΔR (1338 bp)

ACAGTGGCCCTGCACCTGGCCATCCCCCTGAAGTGGAAAGCCAAACCACACCCAGTGTGGATCGACCAGTGGCCCTCCCCGAGGGCAAACTGGTGG  
CCCTGACCCAGCTGGTGGAAAAGGAGTGCACCTGGGCGACATCGAGCCTTCTCTAGCTGTGGAATACCCCTGTCTTCGTGATCAGAAAAGGCCAG  
CGGCTCTTACAGACTGTGATCTGAGAGCAGTAAATGCCAAGCTGGTCCCTTCCGTGCCGTCAGCAGGGCGCTCTGTGCTCCGCCCTG  
CCAGACTTGGCCTCTGATGGTGTGATCTGAAGGACTGCTTTCTTCTATCCCTTGGCCGAGCAGGACAGAGAGGCGCTTCCGCTTTACTGCT  
TCTGTGAACAACCAGGCTCCAGCTCGCAGATTCAGTGGAAAGTGTCTCCCGAGGGGATGACTGTAGCCCAACATCTGCCAGCTGATCGTGGGCC  
AGATCTTGAACCACTGCGGTGAAGCACCCAGCCTGAGAATGTGCACTACATGGACGACCTGTGCTTGGCGCTTACTAGCCACGACGGCCTCGA  
GGCCCGCGGAGGAAGTATCTCCACACTGGAAGAGCGGATTCACCATAGCCCTGATAAAGGTGACGCGGGAACCTGGCGTTCAATACCTGGCC  
TATAAGCTGGGAAGCAGTACGTGGCCCTGTCCGCTGTGGCAGAACCTAGAATCGCTACACTGTGGGACGTGCAGAAAGCTGTGGGCAGCCTGC  
AGTGGCTGAGACCCGCCCTTGAATTCACCTAGACTGCGGGGACCTTCTACGAGCAGTGCAGGCGCTCCGATCCTAACGAGGCCAGAGAGTGGAA  
CCTGGACATGAAAATGGCCTGGCGGAAATCGTGAAGTGAACACACCCCGCCTGGAGAGATGGGATCCTGCCCTGCTTGGAGGGCCCGGTG  
GCCCGGTGCGAACAGGGAGCTATCGCCGTGCTGGCGTGGCCAGGACTGAGCACCACCCAGACCTTGCCTGTGGCTTTACGACACACAGCTACCAAGG  
CCTTACCGCCTGGCTGGAAGTGTGACTGACTGCTGATCAACAGCTGCGGGCCAGCCTGCGGACCTTCGGCAAGGAAGTGCACATCTGCTACT  
GCCTGCTGTTTAGAGATGATCTGCCACTGCTGAGGGATCTCTGCTGCTGAGAGGCTTTGCCGCAAGATCCGGAGCAGCAGCCCTAGCA  
TCTTGCATATCGCCAGACCTTGCACGTGTCCCTGAAGGTGGCGGTGACCGACCCCTGGCCTGGACCTACCGTGTGTTACCGACGCCTCATTAGC  
ACCCACAAGGGCGTGGTGGTGTGGAGGGAAGGCCCCGTTGGGAGATTAAAGAAATCGCCGACCTGGGCGTAGCGTGAACAACCTGGAGGCCAGA  
GCCGTGGCCATGGCCCTCCTGCTGTGGCCTACCACCCCTACAACTGGTTACAGACAGCGCTTCTGTTGGCAAGATGTGTTGAAAATGGGCCAGG  
AGGGAGTGCCTAGCACCAGCCTGCTTTTCATCTCGAGGACGCCCTGTCTCAGAGAAGCGCTATGGCCGCGTGTGATGTGGGTCCACAGCGA  
GGTGGCCGCTTTTACCAGAGGCAACGACGTGGCCGATAGCCAGGCCACATTCAGGCCCTAC

### Gs group II intron-RT (1260 bp)

ATGGCCCTGCTGGAGCGGATCCTGGCCAGAGACAACCTGATCACCGCTCTGAAGCGGGTGGAGGCAATCAGGGCGCCCAGGCATCGACGGCGTCT  
CCACAGATCAGCTGCGGATACATCCGGGCCATTGGAGCACCATCCACGCTCAGCTGCTGCTGGCACATACCCCTCTGCCCGGTGCGGAGAGT  
GAGATTCCTAAGCCCGCGGAGGAACAAGACAGCTGGGAATCCCCACCGTGGTTGATCGCTGATCCAGCAGGCCATCTGCAGGAGCTGACCCTA  
TCTTGCATCTGACTTACAGAGCTTAGCTTCCGCTTCCGGCCCGGACAGAAACCGCCACGACCGCTGCACAAGCCCAGGGCTATATCCAGGAGG  
CTACCGGTACGTTGGTGAACCTGACCTCGAGAAGTCTTCGACAGATGAACACAGATATCTGATGAGCAGAGTGGCCAGAAAGGTGAAGGACAA  
GCGAGTCTGAAGCTGATCAGAGCCTACTGCAAGCTGGAGTAGTATGATGAGGCGGTAAGGTGACAGCCGAGGAAAGGCCACCTCAGGGTCCGCC  
TCTGAGCCCTGCTGGCCAAACATCTGCTGGACGACCTGGACAAGGAACCTGGAAAACCGGGCCTGAAATTTGTAGATACGCCGATGACTGCAAC  
ATCTACGTGAAAAGCTGCGGGCAGGCCAGAGAGTCAAGCAGAGCATCCAGAGATTCCTGGAAAAGACCCTGAAGCTGAAAGTGAATGAGGAAAAAG  
TCTGGCGTGGACCTTGGAAAGAGAGCCTTCTGGCTTTTCTACCCCGAGAGAAAGGCCAGAATCCCGCTGGCCCTCGGAGATTCAGG  
ACTGAAGCAAAGAATTAGACAGCTGACAAACCCCAACTGGTCTATCAGCATGCTGAGCGGATCCACAGAGTGAACAGTACGTGATGGCTGGATC

GGCTACTTTAGACTGGTGAAACCCCTAGCGTCTTCAAACAATCGAGGGATGGATCAGACGAGACTGAGACTCTGCCAGTGGCTGCAGTGGAAGA  
GAGTGGCGACAAGAATCAGGGAAGCTGAGAGCTCTGGGCTGAAAGAGACAGCTGTGATGGAATCGCCAACACCAGAAAGGGCGCCTGGGCGACC  
ACCAAGACACCACAGCTGCACCAGGCCCCTGGGCAAGACCTAGTACTGGACCCCGGGGACTGAAATCCCTGACCAGAGATATTCGAGCTGAGACAG  
GGC

**Tel4c group II intron RT (1686 bp); Tel4c group II intron RT-truncation 1 (1506 bp): Tel4c group II intron RT-truncation 1 (1209 bp)**

ATGGAAACCAGGCAGATGACAGTGGATCAGACCACCGGCGCGTGACCAACCAAACAGAGACAAGCTGGCACAGCATCAACTGGACC AAAGCCAAAC  
AGAGAGGTTAAGAGACTGCAGGTGCGGATCGCTAAGGCCGTTAAAGAAGGCAGATGGGGCAAGGTGAAGGCCCTGCAATGGCTGCTGACCCACTCC  
TTCTACGGCAAGGCTCTCGCCGTGAAACGGGTGACCGACAACAGCGGCTCTAGAACACCCGGCGTGGACGGCATCACCTGGAGCACCAGGAGCAG  
AAAACCCAAAGCCATCAAAAAGCCTGAGAAGAAGAGGCTACAAGCCCAAGCCTCTGGCGAGAGTGTACATCCCTAAGGCCAAACGGCAAGCAGAGACT  
CTGGGCATCCCCACCATGAAGGACCGGGCTATGCAGGCCCTGTACGCCCTGGCACTTGAACCTGTGGCCGAGACTACAGCCGACAGAAACAGCTACG  
GATTCAGAAAGAGGCAGATGACCGCCGATGCCCCTGGCCGCTCTGCGCGTGGGCTCTGCGCAGAGTGAAGCCAAGAGCCGCGGACGACGTGCTGGACCGCCGAT  
CTCTGGCTGTTTTGATAACATCAGCCACGAGTGGTGTCTGGCCAATACCCTCTGGACAAGGGAATTCGAGAAAGTGGTGAAGTCTGGTCTCTGTG  
GGAAGCAGCAGCTCTCCCCACACAGCCGGCACCCCTCAGGGCGGCGTGATCTCCCTGTGCTGGCCAATATCACCTGGATGGCATGGAAGAGCT  
GCTGGCTAAGCAGCTGCGGGGACAGAAGTGAACCTGATGGCGGTGGCCGATGATTTCTGTTGACCCGAAAAGATGAGGAAACCCCTGGAAGAAAGGC  
CAGAAACCTGATCCAAGAGTTCCTGAAGGAAAGAGGCCTGACACTGTCTCTGAGAAGACAAAGATCGTGCACATCGAGGAAGGTTTTGACTTCTGT  
GGATGGAACATCAGAAAGTACAACGGCGTCTGCTGATTAAGCCTGCCAAGAAGAACGTGAAGGCCCTTCCTGAAAAGATCCGGGATACCTGGCG  
GAAGTGAAGCCGCACACAGGAGATCGTGATCGACACTCAACCCATCATCAGAGGATGGGCTAACTACCACAAGGGCCAAGTCAGCAAGGAA  
ACATTCATAGAGCTGCTTTGCCACTGGCAAACTGATGGCGGTGGCCGATGATTAACAGCCAGGCATCCTAACAGCCAGGCAAGGCTGGAAGAAAGGC  
ATTTATCAAGAACGGAAGCAGAGATTGGGCTTTGGCATGGTGTATGAAGACAAGAATGGCGAGCTCCGGACCAAGAGACTGATCAAGACCAGCG  
ACACCAAGATCCAGCGGACGTTAAGATCAAGGCCGACGCCAATCCTTTCTCCCAAGATGGGCTGAGTACTTCGAGAAAACGCAAGAACTGGAAGA  
AGGCCAGCGCAGTATCCGACAGAGACTCCGACAGAGAGTCCGACAGGCTGCGGCGGCTTGCCTGTGTCGGCGGAAAATGAGCAAGGACGATGC  
TGACAGACATCCACCACATCTGCCCCAAGCACAAGGCGGTTCCGACGACCTGGATAACCTGGTGTGATCCACGCCAACTGCCACAAGCAGGTGCA  
CAGCCGGACGGCAGACTCTCGGAGCTGTGAAAGAGGGCCTG

**Supplemental Data 2: codon usage M-MLV RT variants**

**IDT M-MLV RT**

ACCTTAAACATAGAGGACGAATACCGACTCCACGAAACGAGCAAGGAACCTGATGTTTCTTTGGGAGTACGTGGTTGTCCGACTTTCCGCAAGCCT  
GGGCGAAACGGGGGATGGGTCTCGCAGTACAGACGGCTCCTCTTATCATTCCTTTGAAAGCGACTCAACGCCAGTGTCAATCAAACAATACCC  
AATGAGTCAAGAGCAAGGCTCGGAATAAAGCCCCATATACAAAGGCTCTCGATCAGGGGATCTTGGTACCATGCCAAAGCCATGGAATACGCCCT  
CTCTCCCGTCAAGAAACCGGACAGAACGATTATAGACCGTTCACCGCTCCTCGGCAAGTCAATAAGCGGTTGAGGATATACCGACAGACTAC  
CTAACCCTACAATCTGTCTGTGCTGGCCTGCCACCGTACACCAATGGTATACCCTATTGGACCTGAAAGATGCCTTTTTTCTGCCTGAGACTGCACCCCA  
CCTCCAAACCTATGTTTGCATTTCAGTGGAGGGATCCAGAAATGGGATTGAGGCAATGACTTGGACCAAGGCTCCCCCAAGGTTTTAAAATTTCA  
CCAACCTTTTTAATGAGGGCTGCACAGAGACTTGGCCGCTTGAAGTTCACACCCCGACTTCTTTTGGCAATTTCTTTTGGCAGTTCGCTGCTC  
GCCGCGACATCCGAACCTGATGGCAACAGGGAACCCGCGCCTTCTCCAAACCCTTGGTAATCTCGGCTACAGAGCCTCCGCAAAAAGGCCAAA  
TATGCCAAAACAGGTAAATATCTCGGTTATCTCTGAAAAGAGGGCCAGCGTGGCTGACTGAAGCTCGCAAAGAGACCGTTATGGGTCAACCCAC  
CCGGAAGACACTAGCCACAGTGGGAGTTCTGGGTAAGACCGGATTTGGCAGCTTTTATACCGGTTTGGCGAAAATGGCAGCCCCCTTACC  
CTCTGACCAAGCCAGGTACGTTGTTAATTTGGGACCCGATCAACAGAAAGCATAATCAGGAAATTAAGCAGGCACTCTGACTGTCTGCTTGGC  
CTTCTGATCTTACGAAGCCCTTTGAGCTGTCTGTTGACGAAAAGCAAGGATGCTAAAGGCGTTCTTACCAGAAACTCGGTCTTGGAGAGCCCC  
GGTCCGCTACCTTCCAAAAGCTCGATCCTGTGCGCGGCTGCAGGACTGTTGGCATGTGGTGCATGTTGCGCAATTCGCTGACAAAGCCGCG  
GGAAAGCTGACTATGGGGACCGGCTGGTATCTGTCACCGCACGCAGTTGAAGCACTCGTCAAGCAACCTCCGGATCGTGGCTTTCAATGCAA  
GAATGACGCACTACCAAGCCGCTGCTCTGATAGTATAGAGTACAATTTGGACCTGCTGCTGCAATTGAAACCCAGCAGACTTTCTCCGTTGCCAGAG  
GAGGGCTGCAGCATAAATTGCTTGTATCTTTGGCAGAAGCTCATGGCACCCGCTGACTTGACCAGCAACCTTGCTGCTGAGTACCTGAGTGTGCTC  
GTACACTGACGGTCTAGTCTTCTCCAGGAGGGCAACGCAAAAGCTGGCGCGGCTGACTACTGAAACCGAAGTGAATTTGGGCTAAAAGCCCTCCT  
GCGGGTACTTACAGCAGCGGGCAGAAATGATCGCCCTACCAAGGCGTTAAGATGGCCGAAAGGTAAGAAGCTCAACCTTTACAGGACAGTAGGT  
ATGCTTTTGGACCCGACACATACAGGAGATCTATAGACAGGAGGTTGGTCTACATCAGAGGTAAGAAATGAAGCAAAAGACGAAACTG  
TGGCCTCTTGAAGGCCCTTTTCTTCTAAAAGACTTAAAGCATTTATTATGCTGCTGATCAGAAAAGGACATAGCCGGAAGCCAGAGGCAACCCG  
ATGGTGAACAAAGCTGCCGGAAGGCCGCAATCACTGAAACCCAGATACCTAACCCCTTCTATCGAAGACAGAGCCCT

**GeneScript M-MLV RT**

ACCTGAAACATGAAAGTGAAGTACAGACTGCACGAGACATCTAAGGAACCTGATGTGTCCCTGGGTTCTACATGGCTGAGCGACTTCCCTCAGGCCT  
GGGCTGAAACCGGGGATGGGCTGGTGTGCGGAGGCTCCTCTGATCATCCCTCTGAAGGCCACTCCACCCTGTGTCCATCAAGCAGTACCC  
ATGAGCCAGGAGGCGAGCTGGGCATCAAGCCCCACATCCAGCGGCTGCTCAGCCAGGGAATCTTGGTCCCCTGCCAGAGCCCTGGAACACCCCA  
TTTTACTGTGAAAAAGCCGCACTAACGACTACCAGGCTGTGCAAGGACTGAGAGAAAGTGAACAAGCGGTTGAGGACATCAACCCTACAGTGGC  
TAACCCCTACAACCTGCTGTCTGGCTGCCACCGAGCCACCAGTGGTACACCGTGTGGACCTGAAAGACGCTTCTTTCTGTCTGAGACTCCATCCTA  
CCAGCCAGCCTGTTGCTGCTTTCAGTGGCGGGACCTGAGATGGGCATCAGCGGCCAGCTGACATGGACCCGGCTGCCACAGGGCTTCAAGAAACAG  
CCCTACACTTTTCAACGAGGCTGCAACAGAGATCTGGCTGACTTCAAGATCCAGCATCCCTGACCTGATCTGCTGAGTACGTTGGACGACTTGTGCTC  
TGGCGCTACATCTGAACTGGATTGCCAGCAAGGCAACAGAGCTCTGCTCCAGACCTGGGAACCTGGGGTATAGGGCCAGCGCCAAGAAGGCCCA  
GATCTGCCAGAAGCAAGTGAAGTACCTGGGATACCTGTGAAAGGAGGCGCAGAGATGGCTGACCGAGGCGGGAAGGAAACAGTGTGGGCGCCAGCC  
TACCCCTAAGACCCCGACAGACTGCGAGAATCTCTGGGCAAGGCTGGCTTTGTCAGACTGTTCATCCCGGCTTCGCTGAGATGGCCGCTCTGT  
ACCCACTGACCAAGCCCGTACCTGTTCAATTTGGGCCCGATCAGCAGAAAGCCTACCAGGAGATTAAGCAGGCCCTGCTGACCCCTGCTGCCCT  
CGGCTGTCTGATCTGACAAAACCTTTGAGCTGTTTGTGACGAGAAGCAAGGCTACGCCAAGGGCGTGTGACACAGAAACTGGGACTTTGGAGA  
AGACCTGTGGCTTATCTCAGCAAGAAAGCTGGACCCGTCGCGGCGGATGGCTCCATGCTGAGGATGGTCGCGGCTATCGCCGCTGCTGACCAAGG  
ACGCGGCAAACTGACATGGGACAACCTCTGGTGTCTGCGCCCTCAGCCGTCGAGGCCCTGGTGAAGCAGCCTCTGACAGATGGCTGAGCAA  
CGCAGAAATGACCCACTACAGGCTCTGCTGTGATACCGATAGAGTGCAGTTCGGCCCTGGTGGCTGTAATCTCTGCCACCTGTCCCACCTC  
CCGAGGAAGCCCTGCAGCACAACCTGCTGGACATCCTGGCAGAAGCCCAAGCCAGCACAAGACTGACTTAACAGACCAGCCCTGTGCTGATGGCCACCA  
CACCTGGTATACCGACGCGAGCAGCTGCTGCAGGAGGGCCAAAGAAAGGCGGAGCCGCTGACAACAGAAACCGAGGTGATCTGGGCAAGGC  
CCTCCCTGCTGGCACAGGCCAAAGAGCCGAGCTGATTGCCCTACCCAGGCCCTGAAGATGGCCGAAAGGCAAGAACTGAATGTGTACACTGAC  
TCTAGATACGCTTTGCCACAGCCACATCCAGGCGAGATCTACAGACGAGAGGATGGCTAACCTCTGAGGGCAAGGAAATCAAAAACAAGGAT

GAGATTCTGGCCCTGCTGAAGGCACTGTTTCTGCCAAGAGACTGAGCATCATCCACTGCCCGGCCACCAGAAGGGACACAGCGCCGAGGCCGGG  
GCAATAGAATGGCCGATCAGGCCGCTCGGAAGGCCGCCATCACCAGAAACACCCGACACCAGCACACTTCTGATCGAGAAGCTCCAGCCCC

**GeneArt M-MLV RT**

ACCCTGAACATCGAGGACGAGTACCAGGCTGCACGAGACAAGCAAGAACCAGATGTGTCCCTGGGCAGCACCCTGGCTGTCTGATTTTCCACAGGCCT  
GGGCCGAGACAGGCCGAATGGGACTTGCTGTTAGACAGGCCCTCTGTATCATCCCTCTGAAGGCCACAAAGCACCCCTGTGTCCATCAAGCAGTACCC  
CATGAGCCAAGAGGCCCGCTGGGAATCAAGCCCCACATTCAGAGACTGCTGGACCAGGGCATCTGGTGCCTTGTCAAGACCCTTGGAAATACCCCT  
CTGTGCCCCGTGAAGAAGCCCGCACAACGATTACAGACCCGTGAGAGCTGCGGGGAAGTGAACAAGAGAGTGAAGATATCACCCACCCTG  
CCGAATCCTTACAACCTGTCTGTGCGCTGCCTCCAGCCAGCAGTGGTACACAGTGGACCTGAAGGACGCCCTTCTCTGTCTGCGGGTGCACCT  
ACAAGCCAGCCCTGTTTGCCTTCGAGTGGCGGGATCTGAGATGGGCATTAGCGGACAGCTGACCTGGACCAGACTGCCCCAGGGCTTCAAGAACA  
GCCCCACTGTTCACGAGGCCCTGCACAGAGATCTGGCCGACTTCAGAATTACAGCCCCGACCTGATCCTGCTGCAGTACGTTGACGATCTGTGT  
CTGGCCGCCACAAGCGAGCTGGATTGTCTAGCAGGGAACACGCCGCTGTGCTGACAGACTGGGCAATCTGGGCTATAGACCCAGCCAAAGAGGCC  
CAGATCTGCCAGAAAAGTGAAGTACCTGGGCTACCTGTGAAAGAGGGCCAGCGTTGGCTGACCAGGCCAGAAAAGAACCCGTGATGGGCCAG  
CCTACACTAAGACACCCAGACTGAGAGAGTTCCTGGGCAAGCCGGATTCTGCCGGCTGTTATCCTGGCTTTGCCAAATGGCCGCTCCTCT  
GTACCCTCTGACAAAGCCCGAACTCTGTCAACTGGGGCCAGACGAGCAAGGCCACCAAGAGATTAAGCAGAGTAAAGCAGCCCTGTGACAGCCCTGT  
CTGGGACTGCCTGATCTGACCAAGCCTTTCGAGCTGCTTCTGTGGACGAGAAGCAGGGCTATGCCAAAGCGTGTGACACAGAAGCTGGCCCTTGGA  
GAAGGCCAGTGGCCCTACTGACGAAAGAACTGGATCCTGTGGCCGCTGGCTGGCCCTCTGTGTGAGAATGGTGGCCGCTATTGCCGCTGTGACAA  
GGATGCGCGCAAGCTGACAAATGGGACAGCCCTTGGTATTCTGGCCCTCATGGAGTGGAAAGCCCTGCGGTAACAGCCTCTGATCCTGGGCTGAGC  
AAGCCAGATGACCCACTATCAGGCCCTGTGCTGACACCCAGAGAGTGCAGTTTGACCTGTGGTGGCCCTGATCCTGCCACTTCTGTCTGT  
GCTGAGGAAGGCCCTGCAGCACAAGCTGCCTGGATATCTGGCCGAGGCTCACGGCACAAGACCCTGACAGATCAGCCCTTGCAGAGCCGAC  
CACACTGTGTATCAGTATGGCAGCTCCCTGTGCAAGAGGACAGAGAAAAGCCGCGCTGCGGAGACCCAGAGCAAGAGTGAATTTGGCCAAA  
GCTCTGCTGCCGACATCTGTCTAGAGAGCCGAAGCTGATGGCCCTGACACAGGCCCTGAAAATGGCCAGGGCAAAAGCTGAACGTGTACACCC  
ACTCCAGATACGCCCTTCGCCACCGCTCACATTCAGGGCAGAGCTATGCGCCGAGAGGATGGCTGACTCTGAGGGCAAGAGATCAAGAACAAG  
ACGAGATCTGGCACTGCTGCAAGGCCCTGTTCCTGCTCAAGCCGCTGAGACATCATCCACTGTCCGGCCACCAGAAAGGCCACTCTGTGAGGTAG  
AGGCAACAGATGGCCGATCAGGCCGCCAGAAAGGCCGCCATTACAGAGACCCGACACCAGCACACTGCTGATCGAGAACAGCAGCCCT

**GeneWIZ M-MLV RT**

ACACTGAATATCGAGGACGAGTACAGACTGCACGAAACCAGCAAGGAGCCCGATGTGTCTCTGGGCTCCACATGGCTGAGCGATTTTCCCAGCTT  
GGGCTGAAACCGGCGCATGGGCTCGCCGTGAGACAAGCCCCCTCTATCATCCCTCTGAAAGCCACTCCACCCCGTGAGCATCAACAGTACCC  
CATGTCCCAAGAGGCCAGACTCGGCATCAAACCCCACATCCAGAGACTCTCGACCAAGGCATCTTGGTGCCTTGGCAGAGCCCTGGAAACACCCT  
CTCTCCCCGTGAAGAACAACCAGAACACGACTACAGACCCGTCAGAGAGTGAACAAGAGGTTGAACAAGAGGTTGATATCCATCCACCGTC  
CCTAATCCCTACAATCTGTGAGCGGACTCCCCCCTCCCAACAATGGTACACCCTGCTGGACCTCAAGGACGCCCTTCTCTGTCTGAGACTCCACCCT  
ACCTCCAGCCTCTGTTCGCCTCGAATGGAGAGATCCCGAGATGGGCATCTCCCGCCAGCTGACATGGACCAGACTCCCTCAAGGCTTCAAGAACA  
GCCCCACTCTTTAACGAACTCTGCATAGAGATCTGGCTGATTTCGAATCCAGCATCCCGATCTGATCCTCTCCAATGGCTGACAGTCTGTGT  
CTGGTGTCTACCAGCGAGCTCGATTGCCAGCAAGGCACCAGAGCCCTCTCCAGACCCTCGGCAATCTCGGATATAGAGCTTCCGTAAGAAGGCC  
AAATCTGCCAGAAGCAAGTGAATACCTCGGCTATCTGTGAAAGGACCCAGAGATGGCTGACAGAGGCTAGAAAAGGAAACCCGTATGGGCGCAG  
CCACACCAACAACTAGACAGCTGAGAGAATTTCTGGGCAAAAGCCGGATTTGACACTTCAACCCCGGATCTGATCCTCTCCAATGGCTGACAGT  
TACCCTCTGACCAAGCCCGCACACTGTTTAAATGGGGCCCGACCAACAAGGCTACCAAGAGATCAAGCAAGCTCTGTGACCCGCTCCCGCTC  
TGGGACTCCCCGACTCAACAGCCCTTCGAGCTGTTTGTGACGAAAAGCAAGGCTATGCAAGGGCGTGCTGACCAAAAAGCTGGGCCCCTGGGAG  
AAGACCCGTCCATCTGAGCAAGAAGCTGGATCCCGTGGCCGCTGGCTGGCTCTTGTCTCAGAATGGTGGCCGCTATCCGGCTGTGACAAA  
GATGGCGGAAAGCTGACCATGGGACAGCCCTCTCGTATTCTGGCTCCACGCCGTTGGAAGCTCTGGTGAAGCAGCCCCCGATAGGTGGCTGTCCA  
ACCTGAGAAAGACCACTATCAAGCTCTGTGCTGACACAGATAGGTTCCAGTTTGGACCCGTTGGTGTGATCCTCCGCCACTGCTGTCCATC  
CCGAGGAGGGACTCCAGACAAGCTGCCTGACATTTGGCCGAAAGCCACCGAACCCGATCTGACAGATCAGCCGATCAGCAGATCCCGCAGC  
ATACATGGTACACCGATGGATCTCTGTCTGCAAGAGGGCCAGAAAAGGCTGGAGCCGCGCTGACAAACCAGAGACAAAAGTCACTGGGCCAAGG  
CTGTGCCCGTGGAACTCCGCTCAAAGAGCTGAGCTCATTTGTCTGACCAAGCTTGAAGATGGCCAGGGCAAGAAGTGAACGTCTACACCGA  
CAGCAGATACGCCCTTCCACCCGCTCACATCCAGGGCAGATCTAGAAGGAGGGCTGGCTCACATCCGAGGGCAAGAGATCAAGAACAAGGA  
CGAGATCTGGCTCTTCAAGCCCTCTTCTGCCAAAGAGGCTTAGAATTTATCCATTGGCCCGCCACCAGAAAGGCCATCCCGTGGAGCTGAG  
GCAATAGGATGGCCGACCAGCCGCCAGAAAAGCCGCCATCAGAAAACCCCGACACCAGCACACTGCTGATCGAAAACAGCTCCCC

**Twist Bioscience M-MLV RT**

ACTCTTAACATCGAGGACGAATACCCTTACGAAACTCTAAGGAAACCGGATCAGCCTGGCTCAACCTGGCTCTCAGCCCTCCCAAGCTTG  
GGCAGAGCGGGGCTGATGGGCTGTTGTGAGCAGGCCAATGTATTATCCCTTGAAGGCTACAAGCACACCAAGCTAGCATCAAGCAGTATCCG  
ATGAGCCAGAGGCAAGGCTTGGAAATTAACACATAITCAACGCGTCTGTGATCAAGGGATCCTTGTGCCTTGTCAAAGGCCATGGAATACACCC  
TCTGTGCTGTAAGAAAGCCGCGGCACAAACGACTACAGACCCGTAACAAGACTTGCGGGAAAGTGAATAAAAGGGTCGAGGATATCTCAACAGTAC  
AAAATCCCTATAATCTCTAGTGAGTTCGCCCTTACATCAATGGTATACCTGTTGACCTTAAAGACCGCTTCTTGTCTCCGTTTGCATCCAA  
CTTCTCAACCACTGTTGCAATTGGAATGGGAGAGCCCGAAATGGTATTAGTGTTCAGCTCACATGGACTAGGCTTCCGCAAGGATTTAAGAATTCC  
CCGACACTTTTCAACGAAAGCCCTGCATCGGATCTGGCTGATTTTGAATTTCAACATCCCGATCTGATTTTGTCCCAATATGTTGACGATCTGTTGCTC  
GCTGCAACCAGCAATGGATTGTGACAGGGGACCCGCTTCTTCTAGACGTTGGCAATTGGGATACAGAGCTTCAAGAAAGGACACAGA  
TCTGTCAAAGCAAGTGAATAACCTCGTTACCTGTCTAAGGAAGGCCAAGCCTGGCTTACAGAAGCTAGGAAGGAAACCCTGATGGGACAAACCGA  
CACCTAAACACCAGCCAGCTGCGCAATTTCTCGGTAAGCCGGAATTTTGGCCGCTGTTTATACCAGGATTCGCGGAGATGGCCGACCTCTCTAT  
CCCCTGACAAAGCCGTTACGCTTCAACTGGGGTCTGTATCAGCAGAAAGCTTACCAGGAGATAAAACAGGCCCTTTGACCGCCTGCTCTTG  
GCCTGCCTGACCTTACCAAAACCGTTCGAGCTTTCGTGGATGAGAAAACAAGGGTATGCAAAGGGCTGACCAAGAGGCTGACCCAGAAAGCTTGGCCCTGGCGCAG  
GCCAGTAGCTTATCTCAAAGAAACTGAGTCCCGTTCGCCGCGGATGGCCGCCCTGTCTGCGTATGGTCTGCTATGACAGTCTCTACTAAGAGC  
CGGGAAATTGACAAATGGGCAACCCGTTGTTATCTTTGACCCGACCCGCTGAGCTTGAAGCTTGAAGCAGCCCTGATCCGTTGGCTGCTAATG  
AAGGATGACACTTACCAAGCTCTGCTCTGTGATACCCGTGCTGCAATTTGGCCAGTCTGGCTTGAAGCTGAGCTTGAATCCAGCCATGTGCTTTGCCCTTGCAG  
AAGAGGGCTTCCAGCATAATTTCTGGACATCTCAGAGGGCACATGGGCAAGACCTGATCTGACTGATCAACCACTGCCCGATGCAGATCATA  
TTGTTATACAGACCGCTTCTCTGCTGCAGGAAGTCAAGAAAAGCCGCGGCTGTACGACTGAAACAGAAGTGAATTTGGCAAGGGCTCTC  
CCTGTGAACTTCAAGCAACAGCCGCGAGTTGATCCCTTGACGCAAGCCTGAAAATGGCCGAGGGCAAGAAAATTGAACCTATACACAGACTCCA  
GATACGCTTCCGACCCGACACATTACGGTGTGAGATTTATGCTGTAGAGGATGGCTTACCAGTGAGGGTAAAGAAAATTAAGAACAAAGGATGAAAT  
ACTGGCTCTGTGAAGGCTTGTCTTGGCTAAGCGGTTGTCCATACACTGCCCCTGGGCAACAGAAAGGCCATCCGAGAAAGCCCGGGAAAATA  
GGATGGCCGATCAGCCGCTGAAAAGCCGCGATTACCGAAACCCCGATACTAGTACATTTGCTGATCGAAGCAGACTCTCT

**Benchling M-MLV RT**

ACCCTTAATATTGAAGTATGATTCGGCTACATGAAACATCAAAGAGCCAGATGTTTCTTTGGGTCCACATGGCTGCTGATTTCCCTCAGGCTTG  
GGCGAAACCAGGGGATGGGCTGCGAGTTCGCCAGGCTCCTCTGATTATACCTCTGAAGGCAACCTTACCCTGTTGCATAAAACAGTACCC  
ATGTACAAAGAAGCCAGACTGGGATCAAGCCACACATTCAGAGACTGTTGGACCAGGAAATCTGGTACCCTGTGAGTCCCCTGGAAACAGCCCC

TGCTACCCGTTAAGAAACCAGGGACTAATGATTATAGGCCTGTTCAGGATCTGAGAGAAGTCAACAAGCGGGTGGAAAGACATCCACCCACCCTGCC  
CAACCCTTACAACCTTTGAGCGGGTCCCACCGTCCCACAGTGGTACTGTGCTTGATTTAAAGGATGCCTTTTTCTGCCTGCGCCTCCACCCAC  
AAGTCAGCCTCTTTCGCTTTGAGTGGAGGGATCCAGAGATGGGAATCTCAGGACAATTGACCTGGACCAGACTCCCACAGGGTTTCAAAAACAGT  
CCTACCCCTGTTAATGAGGCACTGCACCGAGACTTAGCAGACTTCCGGATCCAGCACCCTGACTTGATCCTGTTACAGTACGTGGATGATTTACTGCT  
GGCCGCCACATCTGAGCTGGACTGCCAACAGGGTACACGGGCGCTGTTACAAACCCTAGGCAACCTCGGTTATCGGGCTTCGGCTAAGAAAGCCAG  
ATTTGCCAGAAACAGGTCAAGTATCTGGGCTATCTTTTGAAGAGGGTACAGAGATGGCTGACTGAGGCCAGAAAAGAGACTGTGATGGGGCAGCCTA  
CTCCGAAGACCCCTCGCAACTCAGGAGTCTCTGGGGAAGGCAGGCTTCTGTCCCTTCTCATCCCTGGGTTTGCAGAAATGGCAGCCCCCTGTAC  
CCTCTACCAAACCGGCACTCTGTTCAATTGGGGCCAGACCAACAGAAGGCCTATCAGGAAATCAAGCAGGCTCTTTTAACTGCCCCAGCCCTGG  
GCTTGCCAGATTGACTAAGCCCTTTGAGCTCTTTGTGGACAGGACAGGGTCCAGTTCGGACCTGTGGTAGCCCTGAATCCGGCTACACTGCTCCACTGCT  
GCCGGTGGCCTACCTGAGCAAAAAGCTGGACCCAGTAGCAGCTGGGTGGCCCCCTGTTTTCGGGATGGTTCGACGCTATTGCCGTGTGACAAAGGAT  
GCAGGCAAGCTTACCATGGGACAGCCACTGGTCATTCTGGCCCCCATGCAGTGGAGGCACTAGTCAAAACACCCCGCAGCCGCTGGCTTTTCAACG  
CCAGGATGACTACTATCAGGCCTTGGCTTTTGGACACGGACAGGGTCCAGTTCGGACCTGTGGTAGCCCTGAATCCGGCTACACTGCTCCACTGCT  
GAGGAAGGGCTGCAACAACTGCCTTGATATCTGGCCGAAGCCACGGAACCCGACCCGATCTTACGGACCAGCCGCTCCAGACGCGGACCATA  
CCTGGTACACGGATGGAAGCAGCTCTTACAAGAGGGCCAGCTAAGGCGGGAGCTGCGGTGACCACCGAAACAGAGGGTGAATCTGGGCTAAAGCC  
TGCCAGCCGGCAGCTCCGCTCAGCTGATGATTGACACACAGAGTGGTACACCGTGGACTGAAAGATGGCAGAAAGGTAAGAAGACTGATGTTTGGCAGT  
CCGTTATGCTTTGCTACTGCTCATATCCATGGAGAGATATACAGAAGGCGTGGGTGGCTACATCAGAAGGCAAGGAGATTAATAAAGACGAG  
ATCTTGGCGTGTCTTAAAGCCCTCTTTCTGCCAAAAGGCTTAGCATTATTCATTGTCCAGGACATCAAAAGGGACACAGCCGCGAGGCTAGAGGCAA  
CAGGATGGCTGACCAAGCGGCCGAAAGGCAGCCATCACAGAGACTCCAGACACATCTACCCCTCTCATAGAAAATAGTAGCCCC

### Supplemental Data 3: Truncated M-MLV RT<sup>CO</sup>

#### RT<sup>CO</sup>-ΔR (1560 bp)

ACCTGAAACATCGAAGATGAGTACAGACTGCACGAGACATCTAAGGAACCTGATGTGTCCTGGGTTCTACATGGCTGAGCGACTTCCCTCAGGCCT  
GGGCTGAAACCGCGCATGGGCTGGCTGTGCGGCAGGCTCCTCTGATCATCCCTCTGAAGGCCACTCCACCCCTGTGTCCATCAAGCAGTACCCC  
ATGAGCCAGGAGGCCAGACTGGGCATCAAGCCCCACATCCAGCGGCTGCTCGACCAGGGAATCTTGGTCCCTGCCAGAGCCCTGGAACACCCAC  
TTTTACCTGTGAAAAAGCCCGCACTAACGACTACCGGCTGTGACAGGACCTGAGAGAAGTGAACAAGCGGGTTGAGGACATCCACCCCTACAGTGCC  
TAACCCCTACAACCTGCTGTCTGGCCTGCCACCGAGCCACAGTGGTACACCGTGGACTGAAAGAGCGCCTTCTTGTCTGAGACTCCATCCTA  
CCAGCCAGCCACTGTTTCGCTTCGAGTGGCGGGACCTGAGATGGGCATCAGCGGCCAGCTGACATGGACCCGGCTGCCACAGGGCTTCAAGAACAG  
CCCTACACTGTTCAACGAGGCCCTGCACAGAGATCTGGCTGACTTCAAGATCCAGCATCTGACCTGATCTGCTGCAGTACGTGGACGACTTGTCTG  
TGGCCGCTACATCTGAATGGATTGCCAGCAAGGCACAGAGCTCTGCTCCAGACCCCTGGGCAACCTGGGGTATAGGGCCAGCCAAAGAAGGCCA  
GATCTGCCAGAAGCAAGTGAAGTACCTGGGATACCTGCTGAAGGAAGGCCAGAGATGGCTGACCGAGGCGCGGAAGGAAACAGTGTGGGCCAGCC  
TACCCCTAAGACCCCGAGACAGCTGCGAGAATCTCTGGGCAAGGCTGGCTTTTGCAGACTTTCATCCCGGCTTCGCTGAGATGGCCGCTCCTCTGT  
ACCCACTGACCAAGCCCGTACCTGTTCAATTGGGGCCCGATCAGCAGAAAGCCCTACCAGGAGATTAAGCAGGCCCTGCTGACCCGCCCTGCCCT  
CGGGCTGCTGATCTGACAAAACCTTTCGAGCTGTTTGTGACGAGAGAAGCAGGGCTACGCCAAGGGCGTGTGACACAGAACTGGGACCTTGAGAG  
AGACCTGTGGCTTATCTCAGCAAGAAGCTGGACCCCGTGGCCGCGGATGGCTCCATGCTGAGGATGGTTCGCCGCTATCGCCGTGTGACCAAGG  
ACGCCGGCAACTGACCATGGGACAACTCTGGTGTCTGGCCCTCACGCCGCTGAGGCCCTGGTGAAGCAGCCTCTGACAGATGGTGTGAGCAA  
CGCCAGAATGACCCACTACCAGGCCCTGCTGCTGGATACCGATAGAGTGCAGTTCGGCCCTGTGGTGGCTTGAATCTGCCACCTGCTCCACTTC  
CCGAGGAAGGCTGCAGCAACTGCTGGACATCTTGGCAGAAGCCACGGCACAAGACCTGACTTAACAGACCAGCCTTGTCTGATGCGGACCA  
CACC

#### RT<sup>CO</sup>-ΔR-m (1410 bp)

CTGGGTTCTACATGGCTGAGCGACTTCCCTCAGGCCTGGGCTGAAACCGCGGCATGGGCTGGCTGTGCGGCAGGCTCCTCTGATCATCCCTTGAA  
GGCCACCTCCACCCCTGTGTCCATCAAGCAGTACCCCATGAGCCAGGAGGCCAGACTGGGCATCAAGCCCCACATCCAGCGGCTGCTCGACCAGGGA  
ATCTGTGTCCTGCCAGAGCCCTGGAACACCCCACTTTTACCCTGTGAAAAAGCCCGGCACTAACGACTACCGGCTGTGACGACCTGAGAGAAG  
TGAACAAGCGGGTTGAGGACATCCACCCTACAGTGCCTAACCCCTACAACCTGCTGTCTGGCTGCCACCGAGCCACCAGTGGTACACCGTGTGGA  
CCTGAAAGACGCCTTCTTCTGTCTGAGACTCCATCTACCAGCCAGCCACTGTTTCGCTTCGAGTGGCGGGACCTGAGATGGGCATCAGCGGCCAGC  
TGACATGGACCCGGCTGCCACAGGGCTTCAAGAACAGCCCTACACTGTTCAACGAGGCCCTGCACAGAGATCTGGCTGACTTCAAGATCCAGCATCC  
TGACCTGATCTGCTGCAGTACGTGGACGACTTGTGCTGGCCGCTACATCTGAATGGATTGCCAGCAAGGCACCAGAGCTTGTCTCCAGACCCTGG  
GCAACCTGGGGTATAGGGCCAGCGCAAGAAGGCCAGATCTGCCAGAAGCAAGTGAAGTACCTGGGATACCTGCTGAAGGAAGGCCAGAGATGGC  
TGACCGAGGCGCGAAGGAACAGTGTATGGGCCAGCCTACCCTAAGACCCCGAGCAGCTGCGAGAATTCCTGGGCAAGGCTGGCTTTTTCAGACT  
GTTTCATCCCGGCTTCGCTGAGATGGCCGCTCCTCTGTACCCACTGACCAAGCCCGGTACCCTGTTCAATTGGGGCCCGATCAGCAGAAAGCCTACC  
AGGAGATTAAGCAGGCCCTGCTGACCGCCCTGCCCTGGGCTGCCTGATCTGACAAAACCTTTTCGAGCTGTTTGTGACGAGAGAAGCAGGGCTACGC  
CAAGGGCGTGTGACACAGAACTGGGACCTGGAGAAGACCTGTGGCTTATCTCAGCAAGAAGCTGGACCCCGTGGCCCGGATGGCCTCCATGT  
CTGAGGATGGTTCGCCGCTATCGCCGTGTGACCAAGGACCGCCGCAAACTGACCATGGGACAACCTCTGGTGTCTGGCCCTCACGCCGCTGAGG  
CCCTGGTGAAGCAGCCTCTGACAGATGGCTGAGCAACGCCAGAATGACCCACTACCAGGCCCTGTGCTGGATACCGATAGAGTGCAGTTCGGCC  
TGTGGTGGCTTGAATCTGCCACCTGCTCCACTTCCGAGGAAGGC
